# Supplementary material for: The mechanism of controllable dehydrogenation: CPMD study of M(BH4)x(NH3)y (M = Li, Mg) decomposition
Source: Royal Society of Chemistry journal article supplement (doi:10.1039/c5cp06808h), 2016-01-01
Supplement: c5cp06808h1.pdf [file c5cp06808h1.pdf]

## Supplementary Information

### The mechanism of Controllable dehydrogenation: CPMD study of the decomposition of $M(\text{BH}_4)_x(\text{NH}_3)_y$ ( $M=\text{Li}, \text{Mg}$ )

Kun Wang<sup>\*a,c</sup>, Jian-Guo Zhang<sup>\*b</sup>, Xu-Qiang Lang<sup>d</sup>

The total and partial density of states (DOS) of ALB and AMgB are showed in Figure S1. The total DOS of ALB is comprised of 3 groups. The states of the lowest energy at about -20 to -10 eV mainly consists of the N 2s states and small part of H(N) 1s states. The second region, around -10 to -4 eV, is filled by N 2p and B 2s states hybridized with H 1s states. The top of the valence band consists of B 2p and H(B) 1s states. Such distribution of the electronic states suggests the covalence properties of the B-N, N-H and B-H bonds and electrostatic relationship between  $\text{Li}^+$  and B.

For AMgB, it is similar with that of ALB where 3 groups are found in the total DOS map. The lowest energy part from -20 eV to -10 eV is contributed from N 2s states and small part of H(N) 1s states. The second energy region is filled by N 2p and B 2s states hybridized with H 1s states. The top of the valence band consists of B 2p and H(B) 1s states. But we can find an obvious overlap consists of the Mg 3s states and N 2s states around Fermi level. This covalence property proves  $\text{Mg}^{2+}$  polarizes part of N 2s orbitals.

---

<sup>a</sup>Department of Chemistry, Anhui University, Hefei, Anhui 230601, P. R. China. Tel & Fax: +86 551 63861279, E-mail: [wangkun@ahu.edu.cn](mailto:wangkun@ahu.edu.cn)

<sup>b</sup>State Key Laboratory of Explosion Science and Technology, Beijing Institute of Technology, Beijing 100081 P. R. China. Tel & Fax: +86 10 68918091, E-mail: [zjgbit@bit.edu.cn](mailto:zjgbit@bit.edu.cn)

<sup>c</sup>Physical and Theoretical Chemistry Laboratory, University of Oxford, Oxford OX1 3QR, United Kingdom.

<sup>d</sup>State Key Lab of Mechatronics Engineering and Control, Beijing Institute of Technology, Beijing 100081, PR China. E-mail: [langxuqiang0536@163.com](mailto:langxuqiang0536@163.com)

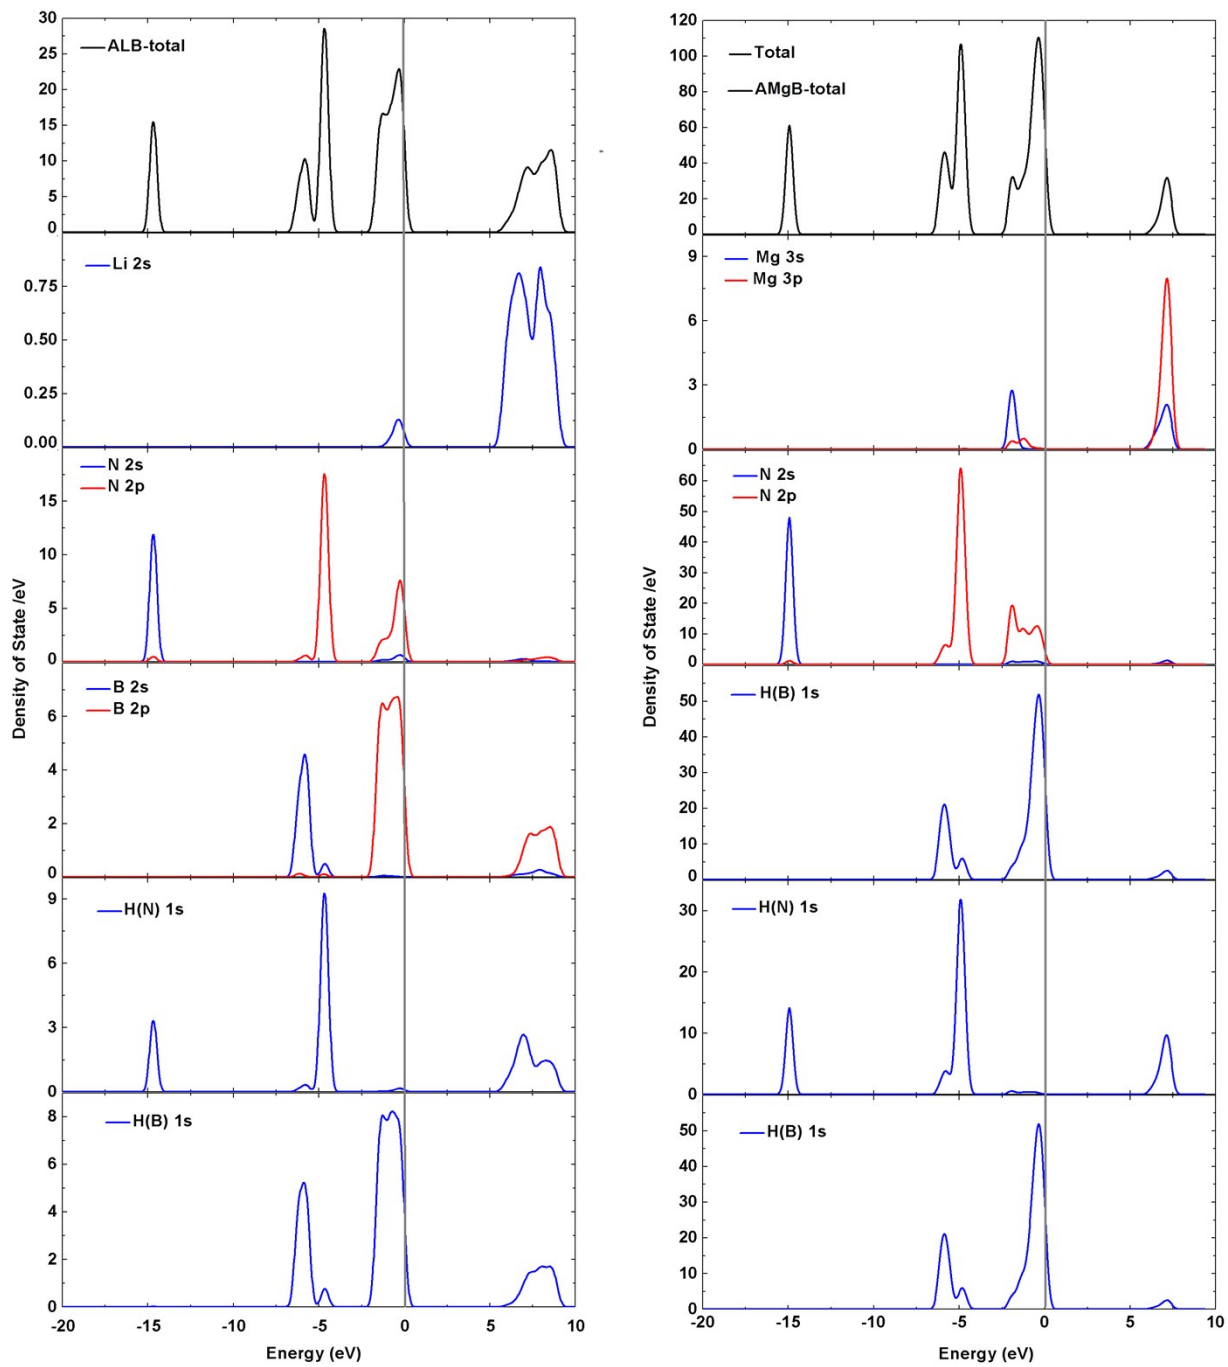

**Figure S1.** The total and partial density of states (DOS) of ALB (Left) and AMgB (Right).

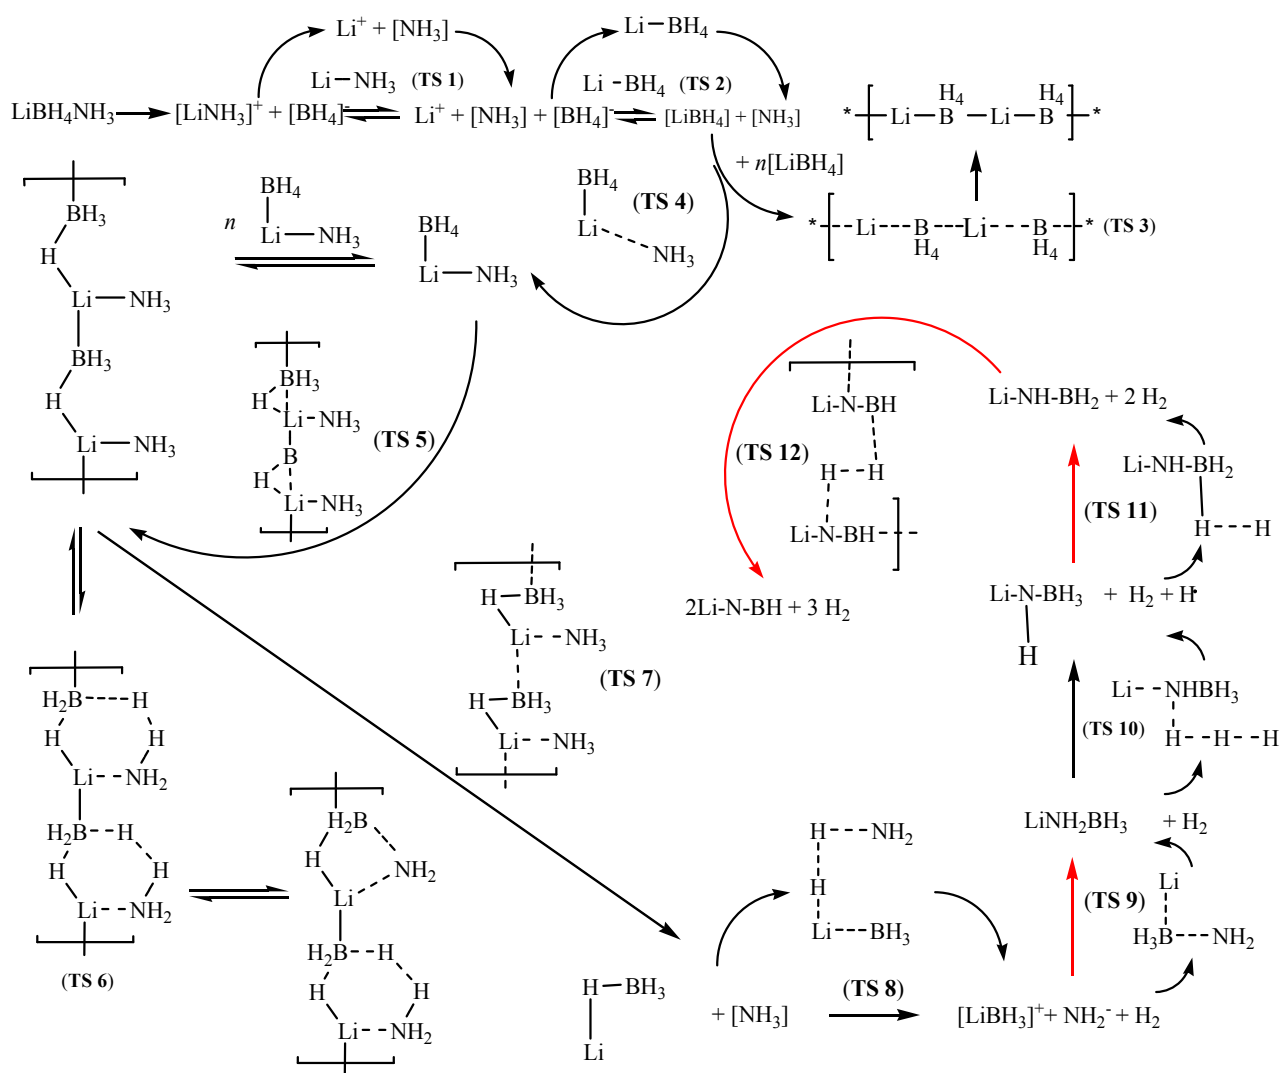

**Figure S2.** The overall decomposition scheme of ALB. (Red arrows highlight the dehydrogenation at high temperature theoretically)

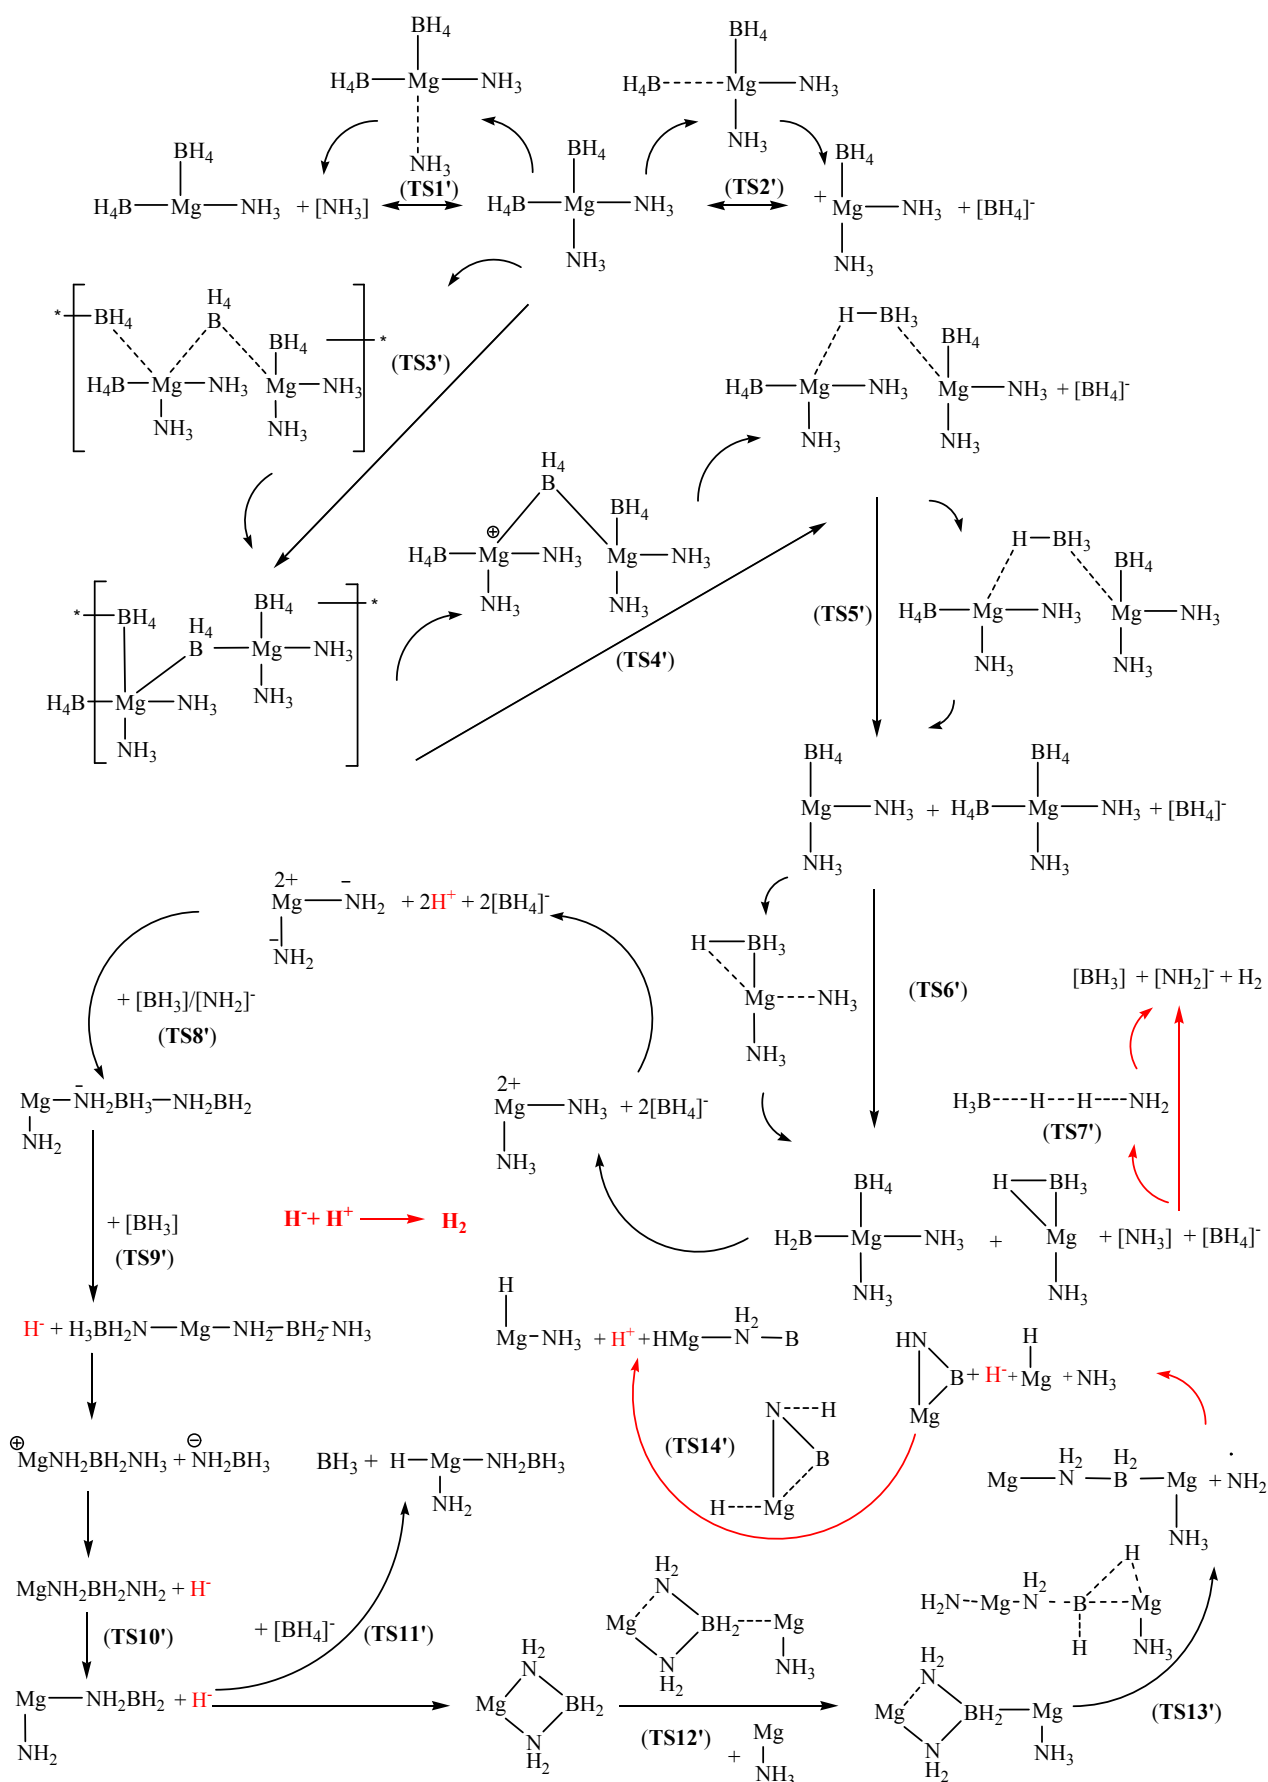

**Figure S3.** The overall decomposition scheme of AMgB. (Red arrows highlight the steps of dehydrogenation, which is caused by the combination of dissociative hydrogen ions)

Table S1 The relationship between the temperature and the steps' setting

| Temperature (K) | Steps (period)           |                      |
|-----------------|--------------------------|----------------------|
|                 | ALB                      | AMgB                 |
| 100 K           | 0-20000 (0-2 ps)         | 0-20000 (0-2 ps)     |
| 200 K           | 20001-40000 (2-4 ps)     | 20001-30000 (2-3 ps) |
| 300 K           | 40001-60000 (4-6 ps)     | 30001-40000 (3-4 ps) |
| 400 K           | 60001-80000 (6-8 ps)     | 40001-50000 (4-5 ps) |
| 500 K           | 80001-100000 (8-10 ps)   | 50001-60000 (5-6 ps) |
| 600 K           | 100001-130000 (10-13 ps) | 60001-80000 (6-8 ps) |
| 700 K           | 130001-150000 (13-15 ps) |                      |
| 800 K           | 150001-180000 (15-18 ps) |                      |
| 900 K           | 180001-210000 (18-21 ps) |                      |

Table S2 The structures of intermediates and the first time they appear in the decomposition of ALB

(Yellow: Li, pink: B, blue: N, white: H)

| Step | Intermediates                                                                                                                                                                                                                                                                                                                                                                               | Time (ps) | Structures                                                                            |
|------|---------------------------------------------------------------------------------------------------------------------------------------------------------------------------------------------------------------------------------------------------------------------------------------------------------------------------------------------------------------------------------------------|-----------|---------------------------------------------------------------------------------------|
| TS1  | $\text{Li}-\text{NH}_3 \longrightarrow \text{Li}\cdots\text{NH}_3 \longrightarrow \text{Li}^+ + [\text{NH}_3]$                                                                                                                                                                                                                                                                              | 0.0245    | 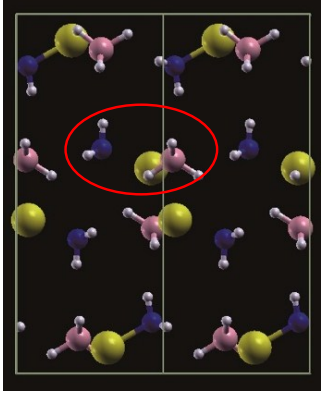   |
| TS2  | $\text{Li}^+ + [\text{BH}_4] \longrightarrow \text{Li}\cdots\text{BH}_4 \longrightarrow \text{Li}-\text{BH}_4$                                                                                                                                                                                                                                                                              | 0.2815    |   |
| TS3  | $n[\text{LiBH}_4] \longrightarrow * \left[ \begin{array}{c} \text{---Li---B---Li---B---} \\ \quad \quad \quad \text{H}_4 \quad \quad \quad \text{H}_4 \end{array} \right] *$ $\longrightarrow * \left[ \begin{array}{c} \text{H}_4 \quad \quad \text{H}_4 \\   \quad \quad   \\ \text{---Li---B---Li---B---} \\   \quad \quad   \\ \text{---} \quad \quad \text{---} \end{array} \right] *$ | 0.5555    |  |
| TS4  | $[\text{LiBH}_4] + [\text{NH}_3] \longrightarrow \begin{array}{c} \text{BH}_4 \\   \\ \text{Li} \cdots \text{NH}_3 \end{array} \longrightarrow \begin{array}{c} \text{BH}_4 \\   \\ \text{Li}-\text{NH}_3 \end{array}$                                                                                                                                                                      | 0.8035    |  |

|     |                                                                                                                                                                                                                                                                                                                                                                                                                                                                                                                          |        |                                                                                       |
|-----|--------------------------------------------------------------------------------------------------------------------------------------------------------------------------------------------------------------------------------------------------------------------------------------------------------------------------------------------------------------------------------------------------------------------------------------------------------------------------------------------------------------------------|--------|---------------------------------------------------------------------------------------|
| TS5 | $n \begin{array}{c} \text{BH}_4 \\   \\ \text{Li}-\text{NH}_3 \end{array} \longrightarrow \begin{array}{c} \text{BH}_3 \\   \\ \text{H} \cdots \text{Li}-\text{NH}_3 \\   \\ \text{B} \\   \\ \text{H} \cdots \text{Li}-\text{NH}_3 \end{array} \longrightarrow \begin{array}{c} \text{BH}_3 \\   \\ \text{H} \\   \\ \text{Li}-\text{NH}_3 \\   \\ \text{BH}_3 \\   \\ \text{H} \\   \\ \text{Li}-\text{NH}_3 \end{array}$                                                                                              | 0.8295 | 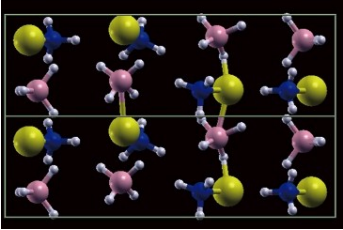   |
| TS6 | $\begin{array}{c} \text{BH}_3 \\   \\ \text{H} \\   \\ \text{Li}-\text{NH}_3 \\   \\ \text{BH}_3 \\   \\ \text{H} \\   \\ \text{Li}-\text{NH}_3 \end{array} \xrightleftharpoons{\text{Step 6}} \begin{array}{c} \text{H}_2\text{B} \cdots \text{H} \\   \quad \quad   \\ \text{H} \quad \quad \text{H} \\   \quad \quad   \\ \text{Li} \cdots \text{NH}_2 \\   \\ \text{H}_2\text{B} \cdots \text{H} \\   \quad \quad   \\ \text{H} \quad \quad \text{H} \\   \quad \quad   \\ \text{Li} \cdots \text{NH}_2 \end{array}$ | 14.728 |    |
| TS7 | $\begin{array}{c} \text{BH}_3 \\   \\ \text{H} \\   \\ \text{Li}-\text{NH}_3 \\   \\ \text{BH}_3 \\   \\ \text{H} \\   \\ \text{Li}-\text{NH}_3 \end{array} \longrightarrow \begin{array}{c} \text{H}-\text{BH}_3 \\   \\ \text{Li} \cdots \text{NH}_3 \\   \\ \text{H}-\text{BH}_3 \\   \\ \text{Li} \cdots \text{NH}_3 \end{array} \longrightarrow \begin{array}{c} \text{H}-\text{BH}_3 \\   \\ \text{Li} \end{array} + [\text{NH}_3]$                                                                                | 16.458 |  |
| TS8 | $\begin{array}{c} \text{H}-\text{BH}_3 \\   \\ \text{Li} \end{array} + [\text{NH}_3] \longrightarrow \begin{array}{c} \text{H} \cdots \text{NH}_2 \\   \\ \text{H} \\   \\ \text{Li} \cdots \text{BH}_3 \end{array} \longrightarrow \text{LiBH}_3 + \text{NH}_2^- + \text{H}_2$                                                                                                                                                                                                                                          | 16.773 |  |

|      |                                                                                                                                                                                                                                                                                      |        |                                                                                       |
|------|--------------------------------------------------------------------------------------------------------------------------------------------------------------------------------------------------------------------------------------------------------------------------------------|--------|---------------------------------------------------------------------------------------|
| TS9  | $\text{LiBH}_3 + \text{NH}_2^- \longrightarrow \begin{array}{c} \text{Li} \\   \\ \text{H}_3\text{B} \cdots \text{NH}_2 \end{array} \longrightarrow \text{LiNH}_2\text{BH}_3$                                                                                                        | 17.309 | 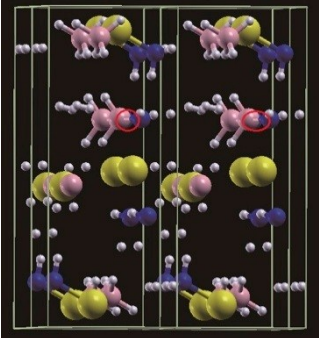   |
| TS10 | $\text{LiNH}_2\text{BH}_3 + \text{H}_2 \longrightarrow \begin{array}{c} \text{Li} \cdots \text{NHBH}_3 \\   \\ \text{H} \cdots \text{H} \cdots \text{H} \end{array} \longrightarrow \begin{array}{c} \text{Li-N-BH}_3 \\   \\ \text{H} \end{array} + \text{H}_2 + \text{H}^\ddagger$ | 18.113 |    |
| TS11 | $\text{H}^\ddagger + \begin{array}{c} \text{Li-NH-BH}_2 \\   \\ \text{H} \end{array} \longrightarrow \begin{array}{c} \text{Li-NH-BH}_2 \\   \\ \text{H} \cdots \text{H} \end{array} \longrightarrow \begin{array}{c} \text{Li-NH-BH}_2 \\   \\ \text{H} \end{array} + \text{H}_2$   | 18.280 |   |
| TS12 | $2 \begin{array}{c} \text{Li-NH-BH}_2 \\   \\ \text{H} \end{array} \longrightarrow \begin{array}{c} \text{Li-N-BH} \\   \\ \text{H} \cdots \text{H} \\   \\ \text{Li-N-BH} \end{array} \longrightarrow 2 \begin{array}{c} \text{Li-N-BH} \\   \\ \text{H} \end{array} + \text{H}_2$  | 19.882 |  |



Table S3 The structures of intermediates and the first time they appear in the decomposition of AMgB

(Green: Mg, pink: B, blue: N, white: H)

| Step | Intermediates                                                                                                                                                                                                                                                            | Time (ps) | Structures                                                                           |
|------|--------------------------------------------------------------------------------------------------------------------------------------------------------------------------------------------------------------------------------------------------------------------------|-----------|--------------------------------------------------------------------------------------|
| TS1  | $  \begin{array}{c}  \text{BH}_4 \\    \\  \text{H}_4\text{B} - \text{Mg} - \text{NH}_3 \\    \\  \text{NH}_3  \end{array}  $                                                                                                                                            | 3.331     | 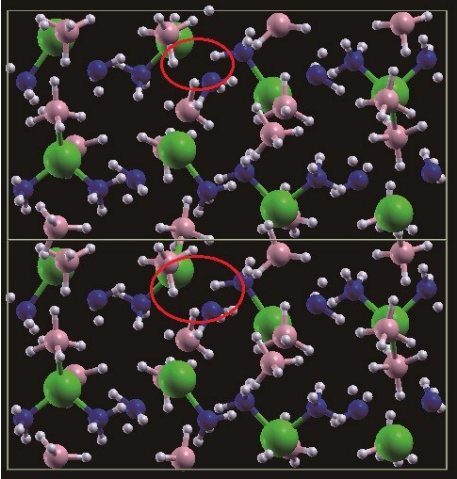   |
| TS2  | $  \begin{array}{c}  \text{BH}_4 \\    \\  \text{H}_4\text{B} \cdots \text{Mg} - \text{NH}_3 \\    \\  \text{NH}_3  \end{array}  $                                                                                                                                       | 3.524     |   |
| TS3  | $  \left[ \begin{array}{c}  \text{BH}_4 \quad \text{H}_4\text{B} \\    \quad \quad   \\  \text{H}_4\text{B} - \text{Mg} - \text{NH}_3 \cdots \text{B} \cdots \text{Mg} - \text{NH}_3 \\    \quad \quad   \\  \text{NH}_3 \quad \quad \text{NH}_3  \end{array} \right]  $ | 3.6595    |  |

|     |                                                                                                                                                                                                                                                                                    |        |                                                                                      |
|-----|------------------------------------------------------------------------------------------------------------------------------------------------------------------------------------------------------------------------------------------------------------------------------------|--------|--------------------------------------------------------------------------------------|
| TS4 | $  \begin{array}{c}  \text{H}_4 \\    \\  \text{B} \\  / \quad \backslash \\  \text{Mg} \quad \text{Mg} \\    \quad   \quad   \quad   \\  \text{H}_4\text{B} \quad \text{NH}_3 \quad \text{BH}_4 \quad \text{NH}_3 \\    \quad   \\  \text{NH}_3 \quad \text{NH}_3  \end{array}  $ | 3.7405 | 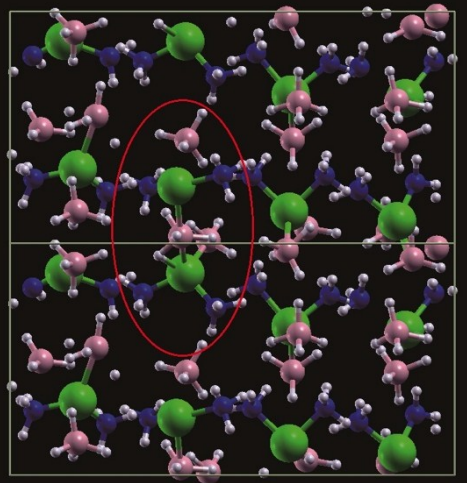   |
| TS5 | $  \begin{array}{c}  \text{H} - \text{BH}_3 \\  \vdots \quad \vdots \\  \text{Mg} \quad \text{Mg} \\    \quad   \quad   \quad   \\  \text{H}_4\text{B} \quad \text{NH}_3 \quad \text{BH}_4 \quad \text{NH}_3 \\    \quad   \\  \text{NH}_3 \quad \text{NH}_3  \end{array}  $       | 3.75   |   |
| TS6 | $  \begin{array}{c}  \text{H} - \text{BH}_3 \\  \vdots \quad \vdots \\  \text{Mg} \quad \text{NH}_3 \\    \\  \text{NH}_3  \end{array}  $                                                                                                                                          | 3.7655 |  |

|     |                                                                                                                                                                                                  |        |                                                                                      |
|-----|--------------------------------------------------------------------------------------------------------------------------------------------------------------------------------------------------|--------|--------------------------------------------------------------------------------------|
| TS7 | $\text{H}_3\text{B} \cdots \text{H} \cdots \text{H} \cdots \text{NH}_2$                                                                                                                          | 3.7995 | 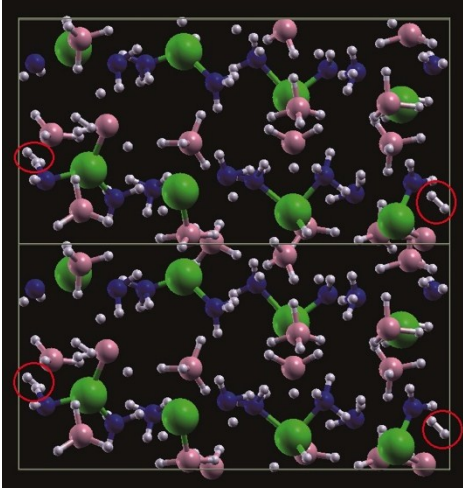   |
| TS8 | $\begin{array}{c} \text{H}_2 \\   \\ \text{Mg} \text{---} \text{N} \text{---} \text{BH}_2 \text{---} \text{N} \text{---} \text{BH}_2 \\   \qquad   \\ \text{NH}_2 \qquad \text{H}_2 \end{array}$ | 4.00   |   |
| TS9 | $\text{H}_3\text{B} \cdots \text{H}_2\text{N} \text{---} \text{Mg} \text{---} \text{NH}_2 \cdots \text{BH}_2 \cdots \text{NH}_2$                                                                 | 4.0275 |  |

|      |                                                                                     |        |                                                                                      |
|------|-------------------------------------------------------------------------------------|--------|--------------------------------------------------------------------------------------|
| TS10 | 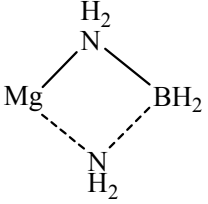   | 4.15   |    |
| TS11 |    | 4.6625 |   |
| TS12 |  | 4.915  |  |

|      |                                                                                                                                                                                                                                                                                    |        |                                                                                                                                                                                                                                                                                                                              |
|------|------------------------------------------------------------------------------------------------------------------------------------------------------------------------------------------------------------------------------------------------------------------------------------|--------|------------------------------------------------------------------------------------------------------------------------------------------------------------------------------------------------------------------------------------------------------------------------------------------------------------------------------|
| TS13 | 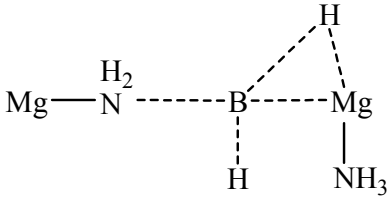 <p>Chemical structure diagram for TS13 showing a transition state. Atoms are labeled: Mg, N, B, H, and NH<sub>3</sub>. Dashed lines indicate partial bonds between Mg-N, N-B, B-H, and B-Mg.</p> | 5.1075 |  <p>3D ball-and-stick model of the TS13 transition state. Atoms are color-coded: Mg (green), N (blue), B (pink), H (white), and NH<sub>3</sub> (blue, white, red). A red circle highlights the central region of the transition state.</p> |
| TS14 |  <p>Chemical structure diagram for TS14 showing a transition state. Atoms are labeled: N, B, H, and Mg. Dashed lines indicate partial bonds between N-H, N-B, B-H, and B-Mg.</p>                 | 6.1325 |  <p>3D ball-and-stick model of the TS14 transition state. Atoms are color-coded: N (blue), B (pink), H (white), and Mg (green). A red circle highlights the central region of the transition state.</p>                                   |
